# Supplementary material
Source: PubMed Central journal article supplement (PMC11304118)
Supplement: jama-e248693-s004.pdf [file jama-e248693-s004.pdf]

\*First name, last name, and suffix (if applicable) are required and will appear in PubMed.

| <b>*Group Name(s): ZEPHYRUS-1 Study Investigators</b> |                   |                              |                  |                                                               |                                                  |                                                         |                                                                                            |
|-------------------------------------------------------|-------------------|------------------------------|------------------|---------------------------------------------------------------|--------------------------------------------------|---------------------------------------------------------|--------------------------------------------------------------------------------------------|
| <b>*First Name and Middle Initial(s)</b>              | <b>*Last Name</b> | <b>*Suffix (eg, Jr, III)</b> | Academic Degrees | Institution                                                   | Location (city, state/province, country)         | Role or Contribution, eg, chair, principal investigator | Group (if more than 1 Group listed in the byline) and/or Subgroup (eg, Steering Committee) |
| Simon                                                 | Bowler            |                              |                  | Mater Health Services Adult Hospital                          | South Brisbane, Queensland, Australia            |                                                         |                                                                                            |
| Tamera                                                | Corte             |                              |                  | Royal Prince Alfred Hospital                                  | Sydney, New South Wales, Australia               |                                                         |                                                                                            |
| Mark                                                  | Holmes            |                              |                  | Royal Adelaide Hospital                                       | Adelaide City Centre, South Australia, Australia |                                                         |                                                                                            |
| Francis                                               | Thien             |                              |                  | Box Hill Hospital                                             | Box Hill, Victoria, Australia                    |                                                         |                                                                                            |
| John                                                  | Wheatley          |                              |                  | Westmead Hospital                                             | Westmead, New South Wales, Australia             |                                                         |                                                                                            |
| Sun-Mi                                                | Choi              |                              |                  | Seoul National University Hospital                            | Jongno-gu, Seoul, South Korea                    |                                                         |                                                                                            |
| Man-Pyo                                               | Chung             |                              |                  | Samsung Medical Center                                        | Gangnam-gu, Seoul, South Korea                   |                                                         |                                                                                            |
| Sunghwan                                              | Jeong             |                              |                  | Gachon University Gil Medical Center                          | Namdong-gu, Incheon, South Korea                 |                                                         |                                                                                            |
| Yonghyun                                              | Kim               |                              |                  | The Catholic University of Korea, Bucheon St. Mary's Hospital | Bucheon-si, Gyeonggi-do, South Korea             |                                                         |                                                                                            |
| Eun-Joo                                               | Lee               |                              |                  | Korea University Anam Hospital                                | Seonbuk-gu, Seoul, South Korea                   |                                                         |                                                                                            |
| Hyun-Kyung                                            | Lee               |                              |                  | Inje University Busan Paik Hospital                           | Busanjin-gu, Busan, South Korea                  |                                                         |                                                                                            |
| Choonsik                                              | Park              |                              |                  | Soonchunhyang University Bucheon Hospital                     | Bucheon-si, Gyeonggi-do, South Korea             |                                                         |                                                                                            |
| Jong Sun                                              | Park              |                              |                  | Seoul National University Bundang Hospital                    | Seongnam-si, Gyeonggi-do, South Korea            |                                                         |                                                                                            |
| Joo Hun                                               | Park              |                              |                  | Ajou University Hospital                                      | Suwon-si, Gyeonggi-do, South Korea               |                                                         |                                                                                            |
| David                                                 | Chi-Leung Lam     |                              |                  | Queen Mary Hospital                                           | Hong Kong                                        |                                                         |                                                                                            |
| Ming-Cheng                                            | Chan              |                              |                  | Taichung Veterans General Hospital                            | Taichung, Taiwan                                 |                                                         |                                                                                            |

## Supplemental Online Content: Nonauthor Collaborators

\*First name, last name, and suffix (if applicable) are required and will appear in PubMed.

| *First Name and Middle Initial(s) | *Last Name | *Suffix (eg, Jr, III) | Academic Degrees | Institution                                                                              | Location (city, state/province, country) | Role or Contribution, eg, chair, principal investigator | Group (if more than 1 Group listed in the byline) and/or Subgroup (eg, Steering Committee) |
|-----------------------------------|------------|-----------------------|------------------|------------------------------------------------------------------------------------------|------------------------------------------|---------------------------------------------------------|--------------------------------------------------------------------------------------------|
| Kang-Yun                          | Lee        |                       |                  | Taipei Medical University - Shuang-Ho Hospital, Ministry of Health and Welfare           | New Taipei City, Taiwan                  |                                                         |                                                                                            |
| Jie                               | Cao        |                       |                  | General Hospital of Tianjin Medical University                                           | Tianjin, Tianjin, China                  |                                                         |                                                                                            |
| Juan                              | Chen       |                       |                  | General Hospital of Ningxia Medical University                                           | Yinchuan, Ningxia, China                 |                                                         |                                                                                            |
| Rongchang                         | Chen       |                       |                  | Shenzhen People's Hospital                                                               | Shenzhen, Guangdong, China               |                                                         |                                                                                            |
| Huaping                           | Dai        |                       |                  | China-Japan Friendship Hospital                                                          | Beijing, Beijing, China                  |                                                         |                                                                                            |
| Xiuhua                            | Fu         |                       |                  | Affiliated Hospital of Inner Mongolia Medical University                                 | Hohhot, Inner Mongolia, China            |                                                         |                                                                                            |
| Zongan                            | Liang      |                       |                  | Huaxi Hospital of Sichuan University                                                     | Chengdu, Sichuan, China                  |                                                         |                                                                                            |
| Qun                               | Luo        |                       |                  | The First Affiliated Hospital of Guangzhou Medical University                            | Guangzhou, Guangdong, China              |                                                         |                                                                                            |
| Guochao                           | Shi        |                       |                  | Ruijin Hospital Affiliated to Shanghai Jiao Tong University School of Medicine           | Shanghai, Shanghai, China                |                                                         |                                                                                            |
| Zhaohui                           | Tong       |                       |                  | Beijing Chao-Yang Hospital, Capital Medical University                                   | Beijing, Beijing, China                  |                                                         |                                                                                            |
| Limin                             | Wang       |                       |                  | Hangzhou First People's Hospital                                                         | Hangzhou, Zhejiang, China                |                                                         |                                                                                            |
| Shuanying                         | Yang       |                       |                  | The Second Affiliated Hospital of Xi'an Jiaotong University                              | Xi'an, Shanxi, China                     |                                                         |                                                                                            |
| Hongtao                           | Yu         |                       |                  | Henan Provincial Chest Hospital                                                          | Zhengzhou, Henan, China                  |                                                         |                                                                                            |
| Huilan                            | Zhang      |                       |                  | Tongji Hospital, Tongji Medical College of Huazhong University of Science and Technology | Wuhan, Hubei, China                      |                                                         |                                                                                            |
| Jianchu                           | Zhang      |                       |                  | Union Hospital, Tongji Medical College of Huazhong University of Science and Technology  | Wuhan, Hubei, China                      |                                                         |                                                                                            |
| Hui                               | Zhao       |                       |                  | Second Affiliated Hospital of Anhui Medical University                                   | Hefei, Anhui, China                      |                                                         |                                                                                            |
| Wei                               | Wang       |                       |                  | The First Hospital of China Medical University                                           | Shenyang, Liaoning, China                |                                                         |                                                                                            |

## Supplemental Online Content: Nonauthor Collaborators

\*First name, last name, and suffix (if applicable) are required and will appear in PubMed.

| *First Name and Middle Initial(s) | *Last Name    | *Suffix (eg, Jr, III) | Academic Degrees | Institution                                                              | Location (city, state/province, country) | Role or Contribution, eg, chair, principal investigator | Group (if more than 1 Group listed in the byline) and/or Subgroup (eg, Steering Committee) |
|-----------------------------------|---------------|-----------------------|------------------|--------------------------------------------------------------------------|------------------------------------------|---------------------------------------------------------|--------------------------------------------------------------------------------------------|
| Ying                              | Meng          |                       |                  | Nanfang Hospital of Southern Medical University                          | Guangzhou, Guangdong, China              |                                                         |                                                                                            |
| Hong                              | Peng          |                       |                  | The Second Xiangya Hospital of Central South University                  | Changsha, Hunan, China                   |                                                         |                                                                                            |
| Murali                            | Ramaswamy     |                       |                  | Pulmonix, LLC                                                            | Greensboro, NC, USA                      |                                                         |                                                                                            |
| Mark                              | Hamblin       |                       |                  | The University of Kansas Medical Center                                  | Kansas City, KS, USA                     |                                                         |                                                                                            |
| John                              | Fitzgerald    |                       |                  | University of Texas Southwestern Medical Center                          | Dallas, TX, USA                          |                                                         |                                                                                            |
| Nishant                           | Gupta         |                       |                  | University of Cincinnati                                                 | Cincinnati, OH, USA                      |                                                         |                                                                                            |
| Jane                              | Dematte       |                       |                  | Northwestern University                                                  | Chicago, IL, USA                         |                                                         |                                                                                            |
| Srihari                           | Veeraraghavan |                       |                  | Emory University                                                         | Atlanta, GA, USA                         |                                                         |                                                                                            |
| Thomas                            | O'Brien       |                       |                  | Pulmonary Disease Specialist, PA d/b/a, PDS Research                     | Kissimmee, FL, USA                       |                                                         |                                                                                            |
| Tracy                             | Luckhardt     |                       |                  | University of Alabama at Birmingham Hospital                             | Birmingham, AL, USA                      |                                                         |                                                                                            |
| Lisa                              | Lancaster     |                       |                  | Vanderbilt University Medical Center                                     | Nashville, TN, USA                       |                                                         |                                                                                            |
| Marta                             | Kokoszynska   |                       |                  | The University of Vermont                                                | Burlington, VT, USA                      |                                                         |                                                                                            |
| Neil                              | Ettinger      |                       |                  | The Lung Research Center, LLC                                            | Chesterfield, MO, USA                    |                                                         |                                                                                            |
| Thomas D.                         | Kaelin        | Jr                    |                  | Lowcountry Lung and Critical Care, PA                                    | Charleston, SC, USA                      |                                                         |                                                                                            |
| Ather                             | Siddiqi       |                       |                  | Renovatio Clinical                                                       | The Woodlands, TX, USA                   |                                                         |                                                                                            |
| Bridget                           | Collins       |                       |                  | University of Washington                                                 | Seattle, WA, USA                         |                                                         |                                                                                            |
| Mary Beth                         | Scholand      |                       |                  | University of Utah Health                                                | Salt Lake City, UT, USA                  |                                                         |                                                                                            |
| Danielle                          | Antin-Ozerkis |                       |                  | Yale University School of Medicine                                       | New Haven, CT, USA                       |                                                         |                                                                                            |
| Kim                               | Hyun          |                       |                  | University of Minnesota                                                  | Minneapolis, MN, USA                     |                                                         |                                                                                            |
| Christopher                       | Harden        |                       |                  | University of Florida Pulmonary, Critical Care & Sleep Medicine Division | Gainesville, FL, USA                     |                                                         |                                                                                            |
| Frank                             | Averill       |                       |                  | St. Francis Medical Center                                               | Clearwater, FL, USA                      |                                                         |                                                                                            |
| Jorge                             | Mallea        |                       |                  | Mayo Clinic                                                              | Jacksonville, FL, USA                    |                                                         |                                                                                            |

## Supplemental Online Content: Nonauthor Collaborators

\*First name, last name, and suffix (if applicable) are required and will appear in PubMed.

| *First Name and Middle Initial(s) | *Last Name  | *Suffix (eg, Jr, III) | Academic Degrees | Institution                                            | Location (city, state/province, country) | Role or Contribution, eg, chair, principal investigator | Group (if more than 1 Group listed in the byline) and/or Subgroup (eg, Steering Committee) |
|-----------------------------------|-------------|-----------------------|------------------|--------------------------------------------------------|------------------------------------------|---------------------------------------------------------|--------------------------------------------------------------------------------------------|
| Rebecca                           | Bascom      |                       |                  | Penn State Milton S. Hershey Medical Center            | Hershey, PA, USA                         |                                                         |                                                                                            |
| Vandana                           | Seeram      |                       |                  | University of Florida Health, Jacksonville             | Jacksonville, FL, USA                    |                                                         |                                                                                            |
| Amy                               | Hajari Case |                       |                  | Piedmont Healthcare, Inc.                              | Atlanta, GA, USA                         |                                                         |                                                                                            |
| Edward                            | Britt       |                       |                  | University of Maryland, Baltimore                      | Baltimore, MD, USA                       |                                                         |                                                                                            |
| Barry                             | Shea        |                       |                  | Rhode Island Hospital                                  | Providence, RI, USA                      |                                                         |                                                                                            |
| Gerard                            | Criner      |                       |                  | Temple University                                      | Philadelphia, PA, USA                    |                                                         |                                                                                            |
| Mark                              | Gotfried    |                       |                  | Pulmonary Associates, PA - Research                    | Phoenix, AZ, USA                         |                                                         |                                                                                            |
| Yolanda                           | Mageto      |                       |                  | Baylor Scott and White Research Institute              | Dallas, TX, USA                          |                                                         |                                                                                            |
| Sherif                            | El Bayadi   |                       |                  | Pulmonary Health Physicians, PC                        | Liverpool, NY, USA                       |                                                         |                                                                                            |
| Cristina                          | Reichner    |                       |                  | Medstar Georgetown University Hospital                 | Washington, DC, USA                      |                                                         |                                                                                            |
| Joshua                            | Mooney      |                       |                  | Stanford University Medical Center                     | Stanford, CA, USA                        |                                                         |                                                                                            |
| David                             | Hotchkin    |                       |                  | The Oregon Clinic                                      | Portland, OR, USA                        |                                                         |                                                                                            |
| Rodeo                             | Abrencillo  |                       |                  | University of Texas - Houston                          | Houston, TX, USA                         |                                                         |                                                                                            |
| Ryan                              | Boente      |                       |                  | Indiana University School of Medicine                  | Indianapolis, IN, USA                    |                                                         |                                                                                            |
| Joyce                             | Lee         |                       |                  | University of Colorado Denver                          | Aurora, CO, USA                          |                                                         |                                                                                            |
| Alan                              | Betensley   |                       |                  | INTEGRIS Baptist Medical Center                        | Oklahoma City, OK, USA                   |                                                         |                                                                                            |
| Niranjan                          | Jeganathan  |                       |                  | Loma Linda University Health                           | Loma Linda, CA, USA                      |                                                         |                                                                                            |
| Rajat                             | Walia       |                       |                  | Norton Thoracic Institute                              | Phoenix, AZ, USA                         |                                                         |                                                                                            |
| Timothy                           | Albertson   |                       |                  | UC Davis Medical Center                                | Sacramento, CA, USA                      |                                                         |                                                                                            |
| Ivan                              | Rosas       |                       |                  | Baylor College of Medicine                             | Houston, TX, USA                         |                                                         |                                                                                            |
| Dileep                            | Puppala     |                       |                  | Houston Pulmonary Sleep, Allergy and Asthma Associates | Cypress, TX, USA                         |                                                         |                                                                                            |
| Ladly                             | Abraham     |                       |                  | J&L Research                                           | Conway, AR, USA                          |                                                         |                                                                                            |
| Richard                           | Enelow      |                       |                  | Dartmouth-Hitchcock Medical Center                     | Lebanon, NH, USA                         |                                                         |                                                                                            |
| Nitin                             | Bhatt       |                       |                  | Ohio State University                                  | Columbus, OH, USA                        |                                                         |                                                                                            |

## Supplemental Online Content: Nonauthor Collaborators

\*First name, last name, and suffix (if applicable) are required and will appear in PubMed.

| *First Name and Middle Initial(s) | *Last Name     | *Suffix (eg, Jr, III) | Academic Degrees | Institution                                                          | Location (city, state/province, country)                 | Role or Contribution, eg, chair, principal investigator | Group (if more than 1 Group listed in the byline) and/or Subgroup (eg, Steering Committee) |
|-----------------------------------|----------------|-----------------------|------------------|----------------------------------------------------------------------|----------------------------------------------------------|---------------------------------------------------------|--------------------------------------------------------------------------------------------|
| Debabratra                        | Bandyopadhyay  |                       |                  | University of South Florida                                          | Tampa, FL, USA                                           |                                                         |                                                                                            |
| Pedro Carlos                      | Elias          |                       |                  | INSARES                                                              | Ciudad de Mendoza, Mendoza, Argentina                    |                                                         |                                                                                            |
| Miguel                            | Bergna         |                       |                  | Centro Medico de Enfermedades Respiratorias                          | Florida, Buenos Aires, Argentina                         |                                                         |                                                                                            |
| Gabriel Ricardo                   | Garcia         |                       |                  | Centro Platense en Investigaciones Respiratorias                     | La Plata, Buenos Aires, Argentina                        |                                                         |                                                                                            |
| Gaston                            | De Stefano     |                       |                  | Consultorios Medicos. Organización del Buen Ayre. SRL                | Ciudad Autonoma de Buenos Aires, Buenos Aires, Argentina |                                                         |                                                                                            |
| Luis Arturo                       | Wehbe          |                       |                  | Instituto ave Pulmo Fundacion enfisema                               | Mar del Plata, Buenos Aires, Argentina                   |                                                         |                                                                                            |
| Alejandro                         | Chirino        |                       |                  | Respira Salud Clinica Integral                                       | Godoy Cruz, Mendoza, Argentina                           |                                                         |                                                                                            |
| Ramon                             | Rojas          |                       |                  | Investigaciones en Patologias Respiratorias                          | San Miguel de Tucumán, Argentina                         |                                                         |                                                                                            |
| Maria                             | Otaola         |                       |                  | Centro de Investigacion Metabolica 'CINME'                           | Ciudad Autonoma de Buenos Aires, Buenos Aires, Argentina |                                                         |                                                                                            |
| Georgina                          | Miranda        |                       |                  | CEC SPA                                                              | Santiago, Region Metropolitana, Chile                    |                                                         |                                                                                            |
| Matias                            | Florenzano     |                       |                  | Instituto Nacional del Torax                                         | Santiago, Region Metropolitana, Chile                    |                                                         |                                                                                            |
| Rafael                            | Silva Orellana |                       |                  | Centro Investigacion del Maule CIM                                   | Talca, Region del Maule, Chile                           |                                                         |                                                                                            |
| Valeska                           | Glasinovich    |                       |                  | CIMER                                                                | Santiago, Region Metropolitana, Chile                    |                                                         |                                                                                            |
| Olga                              | Shangina       |                       |                  | Clinical Hospital #3                                                 | Kemerovo, Russia                                         |                                                         |                                                                                            |
| Alexey                            | Nikishenkov    |                       |                  | Moscow Regional Research Clinical Institute n.a. M.F. Vladimirovskiy | Moscow, Russia                                           |                                                         |                                                                                            |
| Natalia                           | Kuzubova       |                       |                  | Vvedenskaya City Clinical Hospital                                   | St. Petersburg, Russia                                   |                                                         |                                                                                            |
