# Supplementary material
Source: PubMed Central journal article supplement (PMC11304118)
Supplement: jama-e248693-s005.pdf [file jama-e248693-s005.pdf]

## Data Sharing Statement

Raghu. Pamrevlumab for Idiopathic Pulmonary Fibrosis. *JAMA*. Published May 19, 2024.  
doi:10.1001/jama.2024.8693

### Data

**Data available:** Yes

**Data types:** Deidentified participant data, Other (please specify)

**Additional Information:** study-level clinical trial data (including redacted clinical study reports)

**How to access data:** [raghu@uw.edu](mailto:raghu@uw.edu)

**When available:** With publication

### Supporting Documents

**Document types:** None

### Additional Information

**Who can access the data:** Qualified external researchers

**Types of analyses:** Based on scientific merit, requests from qualified external researchers for medicines and indications approved in the United States and Europe will be considered

**Mechanisms of data availability:** Based on scientific merit, requests from qualified external researchers for medicines and indications approved in the United States and Europe will be considered
